# Supplementary material for: Operationalizing Osteoporosis Guidelines via Deterministic Logic: A Rule-Based Decision Support System that Neutralizes the Expertise Gap
Source: Research Square preprint supplement (doi:10.21203/rs.3.rs-8758035/v1), 2026-02-10

# Bridging the Expertise Gap: Digital Support for Osteoporosis Management

Demonstrating how a rule-based digital tool (CDSS) elevates clinical accuracy and standardizes care.

## BASELINE :

Clinical Variability & Expertise Gap

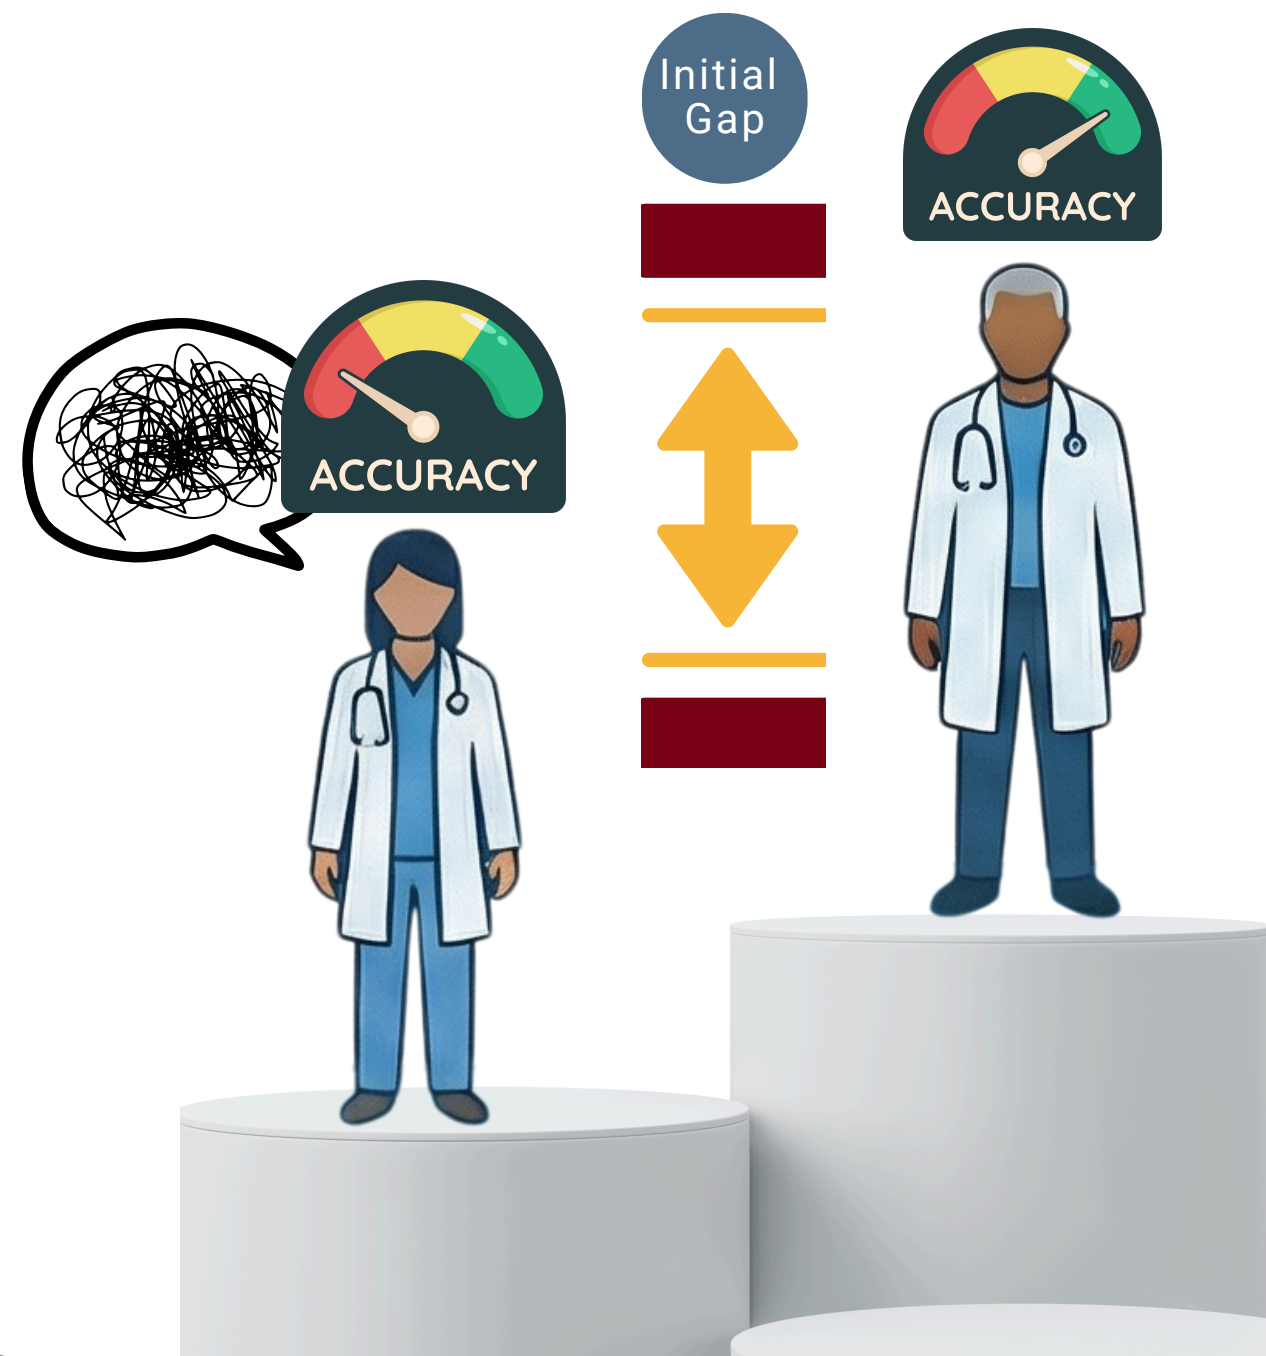

## CDSS INTERVENTION :

System 2 Cognitive Offloading

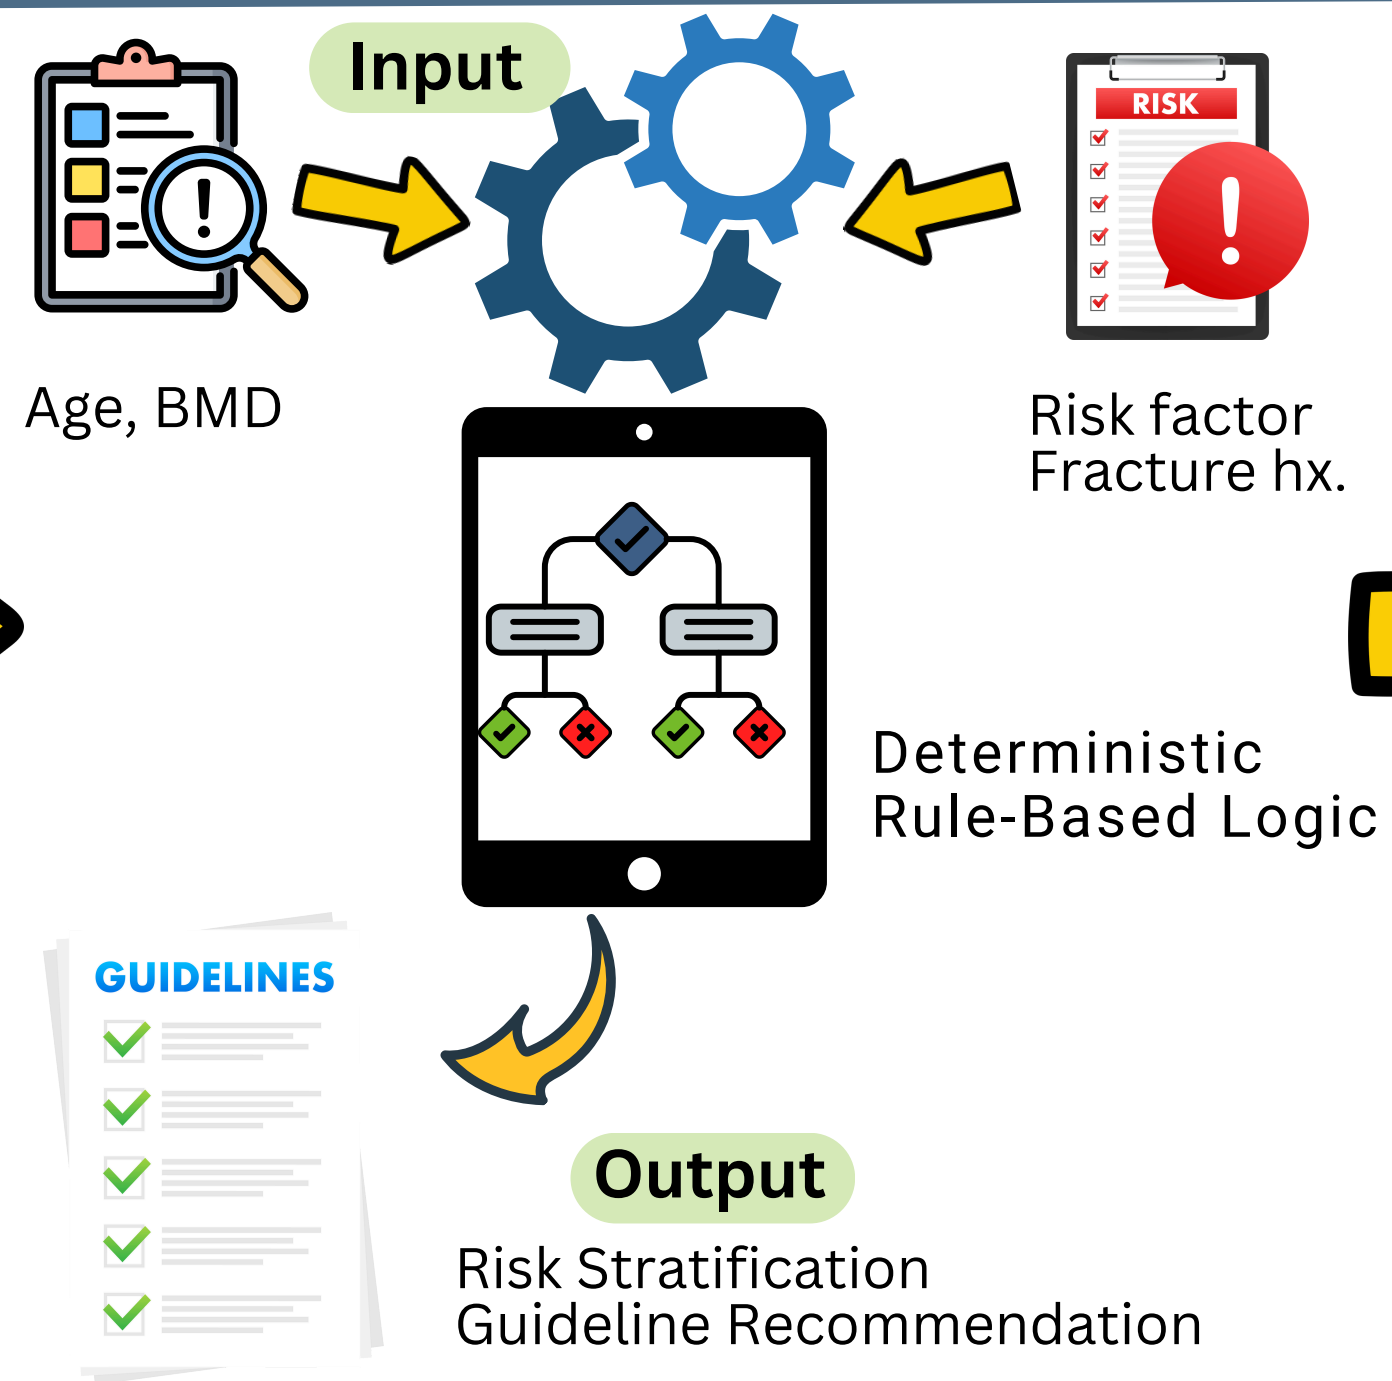

## IMPACT :

Standardized, Efficient Care

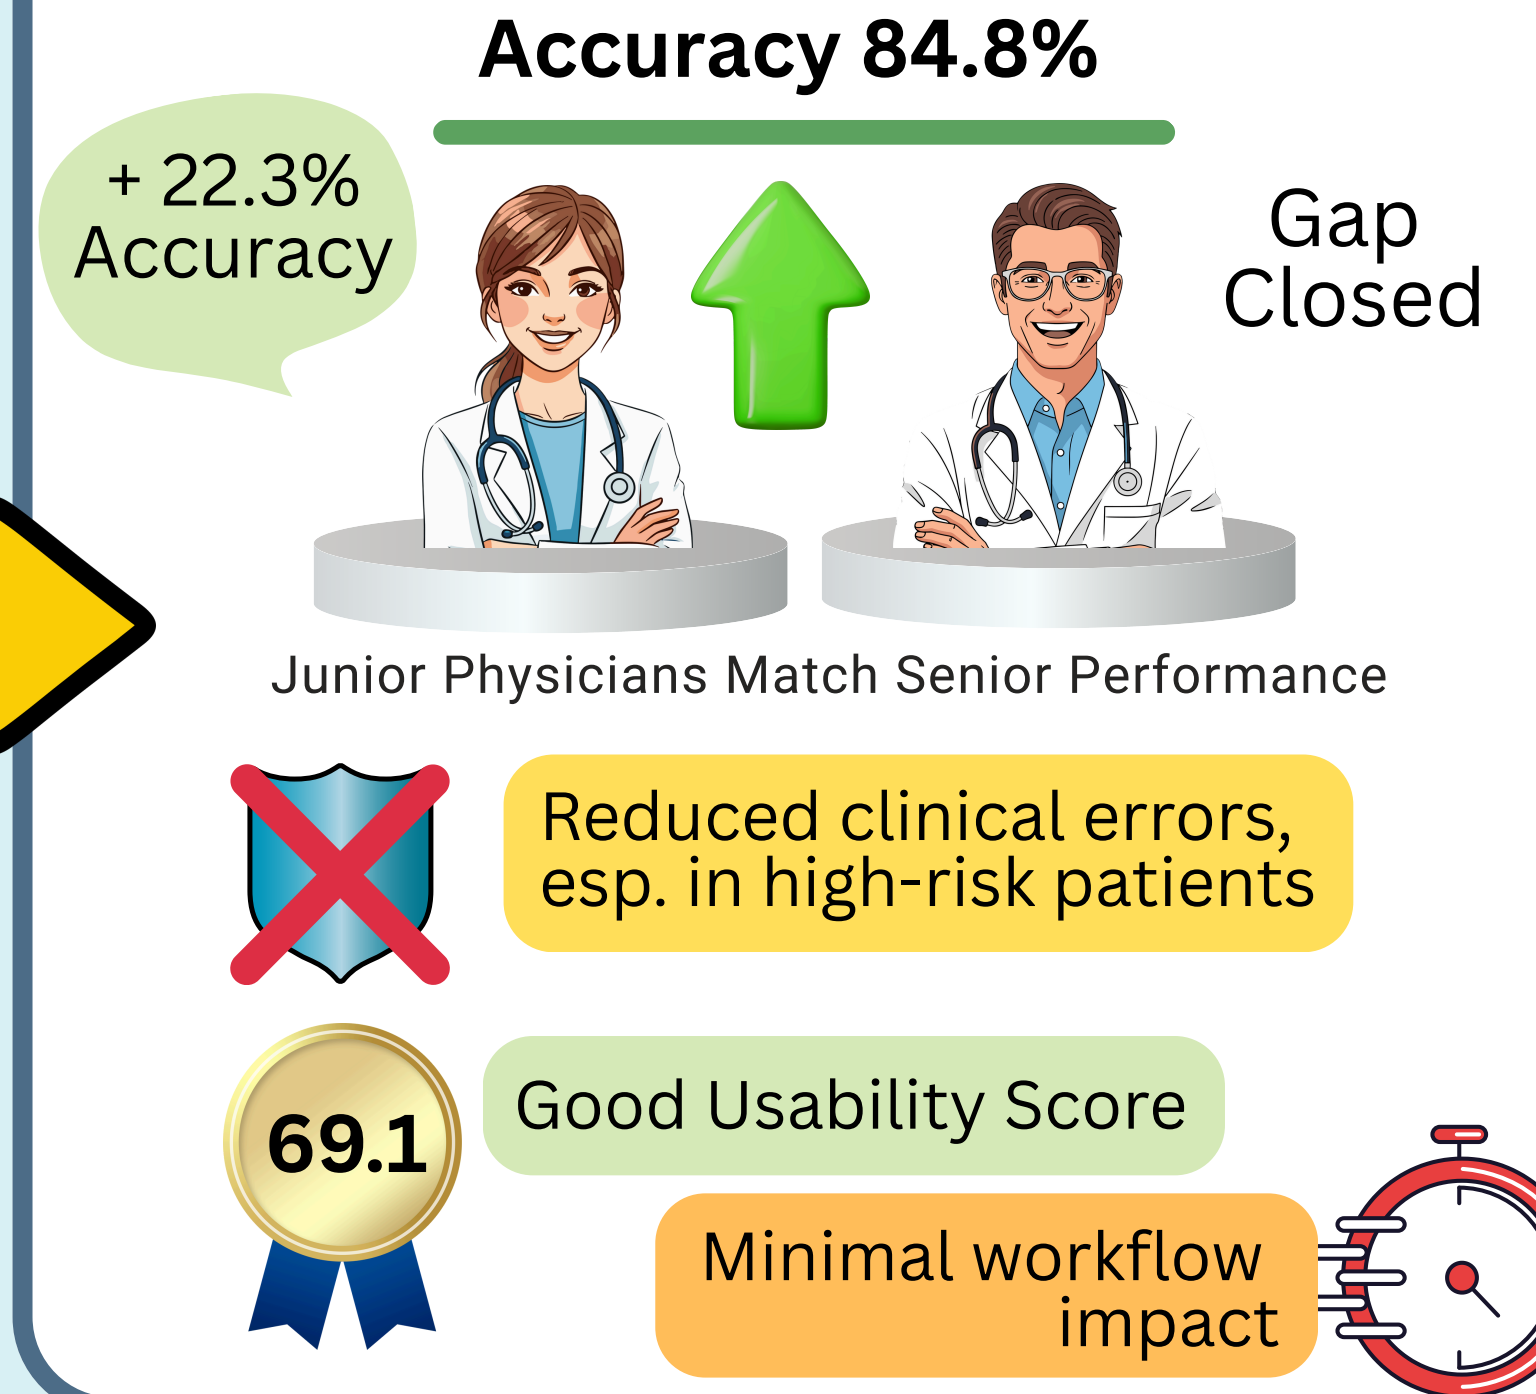

Supplement: Supplementary file 1 [file 5a9eeeaa39314e3b4fd0501d.pdf]
