# Supplementary material for: Operationalizing Osteoporosis Guidelines via Deterministic Logic: A Rule-Based Decision Support System that Neutralizes the Expertise Gap
Source: Research Square preprint supplement (doi:10.21203/rs.3.rs-8758035/v1), 2026-02-10
Supplement: Supplementary file 2 [file 6acab541f58f8d810d5b617e.docx]

**Operationalizing Osteoporosis Guidelines via Deterministic Logic: A Rule-Based Decision Support System that Neutralizes the Expertise Gap**

1. Rule-based CDSS operationalizes complex osteoporosis guidelines for primary care.
2. Deterministic logic improves risk stratification accuracy significantly.
3. The intervention effectively neutralizes the expertise gap among physicians.
4. Digital intervention mitigates heuristic biases in high-frequency practice settings.
