# Supplementary material for: Operationalizing Osteoporosis Guidelines via Deterministic Logic: A Rule-Based Decision Support System that Neutralizes the Expertise Gap
Source: Research Square preprint supplement (doi:10.21203/rs.3.rs-8758035/v1), 2026-02-10
Supplement: Supplementary file 3 [file 9bd7e8f362c379d93e875c20.docx]

## **Additional file 1** Supplementary Table

## S1. Characteristics of the case-vignette bank used in the experiment

| **Characteristic** | **Value** |
| --- | --- |
| Total case vignettes in bank (final) | 41 |
| Age, mean ± SD (years) | 71.8 ± 9.3 |
| Sex | Female: 35; Male: 6 |
| **Risk category (TOPF consensus)** |  |
| – Low | 10 |
| – Moderate | 10 |
| – High | 10 |
| – Very high | 11 |
| **Gold-standard treatment category** |  |
| – No pharmacologic treatment / lifestyle | 20 |
| – Antiresorptive therapy | 10 |
| – Anabolic therapy | 11 |
| Cases with any fracture reported (any site) | 23 |
| **Cases with fragility-site fracture*** | 15 |
| Recent fragility-site fracture (<12 months) | 4 |
| Fragility-site fracture by site (case-level)** | Spine: 11; Hip: 5; Forearm/Wrist: 1; Shoulder/Prox humerus: 1 |

Note

* Fragility-site fractures were defined a priori as spine, hip, wrist/forearm, pelvis, and shoulder/proximal humerus, consistent with TOPF guideline-based risk consideration.
** Counts are not mutually exclusive because a vignette may include fractures at more than one site.

**Supplementary Note**

Non-fragility fractures were included in selected case vignettes to enhance clinical realism. However, only fragility-site fractures (spine, hip, wrist/forearm, pelvis, and shoulder/proximal humerus) were considered in defining osteoporosis risk categories and treatment recommendations according to the Thai Osteoporosis Foundation guideline. Non-fragility fractures did not influence gold-standard risk classification or treatment decisions.
